# Supplementary material
Source: Springer Nature journal article supplement (https://www.springermedizin.de/resource/supplementary/13012_2012_594_MOESM8_ESM.pdf/9630336)
Supplement: MOESM8 [file 9630336]

## Contextual factors (antecedents)

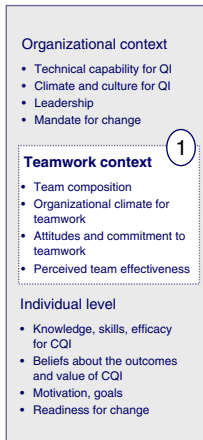

## CQI process

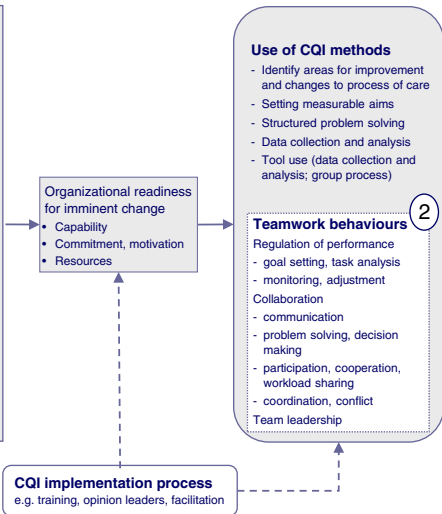

## Outcomes

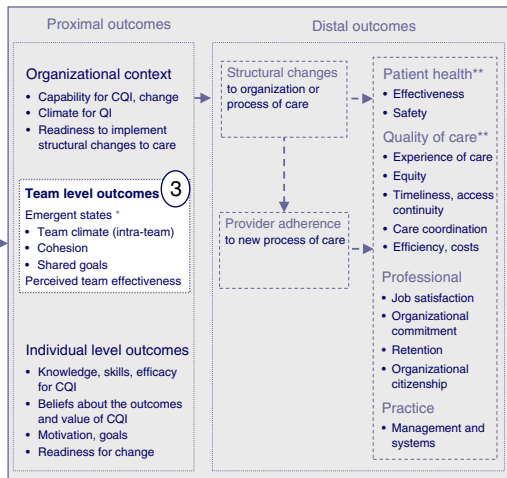

Instruments within the scope of the review reported in this paper cover three domains (shaded in white and numbered as follows in the figure and throughout the review): (1) Teamwork context; (2) Team process; (3) Proximal team outcomes. Areas shaded in grey are covered in a companion review. Those in boxes with dashed lines are outside the scope of either review.

\* Emergent states are perceptions and capabilities of the team that arise from interaction between team members. Although depicted as a proximal outcomes, in subsequent cycles of teamwork they become antecedents that contribute to the teamwork context.

\*\* These outcomes are based on dimensions of quality from Institute of Medicine (U.S.) Committee on Quality of Health Care in America. Crossing the quality chasm: a new health system for the 21st century. Washington DC: National Academy Press, 2001:xx, 337.
